# Supplementary material
Source: PubMed Central journal article supplement (PMC3824547)
Supplement: mmc2.pdf [file mmc2.pdf]

# Transmembrane Exchange of Hyperpolarized $^{13}\text{C}$ -Urea in Human Erythrocytes: Subminute Timescale Kinetic Analysis

Guilhem Pagès,<sup>†</sup> Max Puckeridge,<sup>‡</sup> Guo Liangfeng,<sup>§</sup> Yee Ling Tan,<sup>†</sup> Chacko Jacob,<sup>§</sup> Marc Garland,<sup>§</sup> and Philip W. Kuchel<sup>†‡\*</sup>

<sup>†</sup>Singapore Bioimaging Consortium, A\*STAR, Singapore; <sup>‡</sup>School of Molecular Bioscience, University of Sydney, Sydney, New South Wales, Australia; and <sup>§</sup>Institute of Chemical and Engineering Sciences, A\*STAR, Singapore

**ABSTRACT** The rate of exchange of urea across the membranes of human erythrocytes (red blood cells) was quantified on the 1-s to 2-min timescale.  $^{13}\text{C}$ -urea was hyperpolarized and subjected to rapid dissolution and the previously reported (partial) resolution of  $^{13}\text{C}$  NMR resonances from the molecules inside and outside red blood cells in suspensions was observed. This enabled a stopped-flow type of experiment to measure the (initially) zero-*trans* transport of urea with sequential single-pulse  $^{13}\text{C}$  NMR spectra, every second for up to ~2 min. Data were analyzed using Bayesian reasoning and a Markov chain Monte Carlo method with a set of simultaneous nonlinear differential equations that described nuclear magnetic relaxation combined with transmembrane exchange. Our results contribute to quantitative understanding of urea-exchange kinetics in the whole body; and the methodological approach is likely to be applicable to other cellular systems and tissues in vivo.

## INTRODUCTION

Our aim was to quantify the kinetics of the transmembrane exchange of urea in human erythrocytes using recently available high-sensitivity  $^{13}\text{C}$  nuclear magnetic resonance (NMR) spectroscopy, and a contemporary multiparameter estimation method.

The  $^{13}\text{C}$  NMR spectrum of urea shows partial resolution of the resonances from the molecules inside and outside human erythrocytes (red blood cells; RBCs) in suspension (1). This feature was previously used with  $^{13}\text{C}$  NMR band-shape analysis to study the kinetics of membrane transport of  $^{13}\text{C}$ -urea as it occurs under conditions of equilibrium exchange. Thus, tracer exchange was measured against a background of equal concentrations of urea on either side of the cell membrane. The analysis of this situation does not allow estimation of the initial rate of influx (or efflux), which can only be measured when there is no solute on the opposite (*trans*) side of the membrane (2). The latter measurement is technically demanding, because a type of stopped flow analysis is required with a recording time faster than the kinetic process. This has not been possible before with  $^{13}\text{C}$ -labeled compounds as the sensitivity for detecting  $^{13}\text{C}$  is very low, requiring signal averaging over many seconds or minutes to obtain reasonable signal/noise in the spectrum. However, with the advent of a method for delivering dynamically nuclear-polarized  $^{13}\text{C}$ -labeled molecules in aqueous media (rapid dissolution dynamic nuclear polarization, RD-DNP) whereby the sensitivity for detection is enhanced ~10,000-fold (3),  $^{13}\text{C}$  NMR spectra are obtainable from a single free induction decay. This makes possible the estimation of enzymatic reaction rates

on the 1-s timescale (4–7); and we show here that this can also apply to the membrane transport of  $^{13}\text{C}$ -urea.

Others have carried out phenomenological kinetic analyses of membrane transport using  $^{13}\text{C}$ -RD-DNP, but to our knowledge the kinetic characterization of a membrane transport protein has not been done before. Specifically, by combining  $^{13}\text{C}$  and  $^{31}\text{P}$  NMR data with a relaxation-kinetic model, Harris et al. (8) concluded that the conversion of hyperpolarized pyruvate to lactate in breast cancer cells (T47D) is determined by the rate at which the pyruvate crosses the cell membrane. This outcome was discussed further by Witney et al. (9); and a recent study compared the data fitting using different kinetic models based on first-order rate constants with either two- or three-pool, uni- or bidirectional chemical reactions (10).

The normal adult human (mass ~70 kg) in nitrogen balance produces ~30 g of urea  $d^{-1}$ . This is synthesized primarily in the liver, and being highly water-soluble, it is rapidly excreted into the urine. It has long been known that RBCs are freely permeable to urea and that urea does not serve as an osmotic-support solute in suspensions of these cells. In other words, the membrane is permeable to urea with a rate of exchange comparable to that of water (11,12), making its zero-*trans* transport measurement challenging due to the rapidity of the process. Whether this situation pertains to other cell types, including neoplastic cells, has not been fully explored; and if a quantitative  $^{13}\text{C}$  membrane-flux-measuring method for urea and other solutes that may show a split-peak effect could be developed, it/they might serve as indicators of cell pathology, in vivo.

It can be estimated that, at rest, 20–25% of blood flow (~1.1 L  $\text{min}^{-1}$ ) in the normal adult human is to the kidneys, and that at any given time 10% of that flow is via the vasa recta into the renal medulla, where the glomerular filtrate is concentrated (13,14). The latter is achieved by a

Submitted May 6, 2013, and accepted for publication September 24, 2013.

\*Correspondence: philip.kuchel@sydney.edu.au

Editor: Francesca Marassi.

© 2013 by the Biophysical Society  
0006-3495/13/11/1956/11 \$2.00

<http://dx.doi.org/10.1016/j.bpj.2013.09.034>

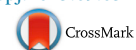

countercurrent exchange mechanism that involves a centripetal concentration gradient of urea, with the interstitial urea concentration possibly reaching  $\sim 1.2\text{ M}$  at the tip of the loops of Henle. Thus RBCs flowing through capillaries in this tissue-zone are exposed to a massive transmembrane urea concentration gradient over a time course of  $\sim 20\text{ s}$ . If the RBC plasma membranes were not freely permeable to urea, given the small molecular size and electrical neutrality of urea, it would leak into the cells and upon return to the normal circulation, a urea-loaded RBC would rupture due to the osmotic gradient across its plasma membrane. Because the mean circulation time back to the left ventricle of the heart is  $\sim 1\text{ min}$ , each RBC is exposed to the renal medulla, on average, every 40 min or  $\sim 36$  times a day. The evolved solution to this problem has been the selection of a transport system that renders the RBC plasma membrane transparent to urea via at least one selective transport protein (15).

In our quest to characterize the function of the urea transporter, we developed experimental methods and data analysis that led to estimates of the Michaelis-Menten steady-state kinetic constants (counterparts of conventional enzyme kinetics) of the transporter, namely the maximal velocities and Michaelis constants (substrate concentrations at half-maximal velocity). These findings have significance in estimating tracer (labeled urea) dilution kinetics throughout the blood and then the whole body.

## MATERIALS AND METHODS

### RBCs

These experiments were approved under regulation No. NUS-IRB 12-199 by the local Institutional Review Board from the National University of Singapore. Erythrocytes were obtained from healthy donors and washed in isotonic saline (154 mM NaCl), with osmolality measured to be 290 mOsmol  $\text{kg}^{-1}$  with a Vapro5600 vapor pressure osmometer (Wescor, Logan, UT) with 10 mM glucose. The cells were then centrifuged (10 min,  $4^\circ\text{C}$ , 3000 g) and the supernatant and buffy coat were aspirated. This operation was repeated twice, followed by bubbling with CO (to render the hemoglobin into a stable diamagnetic state) for 15 min. The cells were then washed twice with a hypertonic solution (300 mM NaCl and 10 mM glucose; the osmolality was measured to be 583 mOsmol  $\text{kg}^{-1}$  exclusive of the glucose) to shrink the cells and hence raise the intracellular protein concentration to increase the transmembrane peak splitting (see below) (1). After the final wash, the hematocrit (*Ht*) was adjusted to  $\sim 90\%$ .

### RD-DNP

$^{13}\text{C}$  urea was dissolved in glycerol at a concentration of 8 M with 15 mM Ox063Me (Oxford Instruments, Oxford, UK) trityl radical, which is used to transfer magnetic polarization from the electrons to the nuclei. To shorten the relaxation time, 2.0 mM DOTAREM [ $\text{Gd}^{3+}2\text{-(4,7,10-tris(carboxymethyl)-1,4,7,10-tetraazacyclododec-1-yl)acetate}$ ] was added (Guerbet Asia Pacific, Tsuen Wan, N.T., Hong Kong) and 35  $\mu\text{L}$  of this mixture was introduced to the hyperpolarizer and rapidly cooled to  $\sim 1.2\text{ K}$ .

The HyperSense (Oxford Instruments) instrument has a 3.35 T superconducting magnet and a 100 mW microwave source. The frequency used for exciting the electron-spin transitions was 94.113 GHz. After  $\sim 1\text{ h}$  of radio-frequency (RF) irradiation, the sample was rapidly dissolved under automatic

control with 4 mL of hypertonic phosphate-buffered saline (PBS) (pH 7.4, 583 mOsmol  $\text{kg}^{-1}$ ) that matched the osmolality of the RBC washing medium.

## NMR spectroscopy

$^{13}\text{C}$  NMR spectra were recorded at 100.3 MHz, on an UltraShield 400 MHz spectrometer fitted with an Avance III console (Bruker, Karlsruhe, Germany). A 10-mm broadband-observe probe was used to record the spectra. The temperatures were calibrated using ethylene glycol and methanol samples and set to 310 K or 293 K inside the NMR tube. A 10-mm O.D. NMR tube was introduced to the spectrometer magnet with a Teflon (E. I. du Pont de Nemours, Wilmington, DE) line connected to a syringe to add or remove solutions while the tube was seated inside the magnet. This Teflon line was thermostated within a double-envelope Perspex tube placed inside the bore of the magnet with water flow from a thermostated bath to give the required temperature at the end of the outlet tube (see Section S1 in the Supporting Material). The magnetic field homogeneity was adjusted on a sample of PBS. A 2-mL suspension of RBCs was added to a 10-mm NMR tube and thermally equilibrated before hyperpolarized  $^{13}\text{C}$  urea was injected into the sample via the thermostated Teflon tube. The total sample volume was always 4 mL so 1 mL of buffer was added to 2 mL of cells when using 1 mL of hyperpolarized urea solution. The buffer was added with or without 40 mM unlabeled urea. Immediately after the injection, recording of the spectral time course was begun. The RF pulse sequence used a 1- $\mu\text{s}$  non-selective (hard) pulse of 66 W from the  $^{13}\text{C}$  channel, invoking a nutation angle (flip angle) of  $\sim 4^\circ$ . A spoiling magnetic-field gradient pulse was applied during the relaxation delay to remove any residual transverse magnetization between transients. The recycle time for each transient was set to 1 s; and 128 spectra were recorded in a pseudo two-dimensional experiment. All experiments were performed at least in duplicate.

## Data analysis

NMR data were processed using the software TOPSPIN Ver. 3.0 (Bruker), and spectra were extracted as a text file that was read into a MATLAB software program (The MathWorks, Natick, MA). The data sets obtained at 20 and  $37^\circ\text{C}$  were preprocessed to align spectra (systematic drift or variation was evident in sequences of RD-DNP  $^{13}\text{C}$  NMR spectra). Then each data set was analyzed independently using the band-target entropy minimization method (17,18). Preliminary analysis identified a third smaller band in each data set, and therefore, for this data, two-peak and three-peak curve fitting models were constructed for the data sets at 20 and  $37^\circ\text{C}$ . The general and adaptable Pearson band-shape model (18) was used for each band and it was assumed that the band shapes and position of each maximum amplitude remained constant for the duration of each time course of spectra. Therefore, only a small number of parameters were needed to be optimized; specifically, two or three sets of band-shape parameters and two or three positions of each maximum were constrained not to vary from spectrum to spectrum, and finally the set of intensity values for each band was fitted. These were obtained by minimizing the sum of the squares of the residuals between simulated data and the experimental data. The signal intensities obtained from this postprocessing of the data were then used as input for fitting the transport model to the data using a program written in *Mathematica* (19), based on those described in Kuchel et al. (20) and Puckeridge et al. (21,22).

## THEORY OF METHODS—MODEL

### Implications of the excited state of the nuclei

In constructing a kinetic model to simulate and fit the  $^{13}\text{C}$ -urea transport data, three important considerations were:

1. To a very good approximation, the signals arise from the hyperpolarized  $^{13}\text{C}$ -atoms only;

2. They relax according to an intrinsic relaxation time constant  $T_1$ ; and
3. All solute fluxes depended on the total concentration of the solute and not only on the detected species (in this case the hyperpolarized  $^{13}\text{C}$  atoms).

The unidirectional conversion rate constant,  $1/T_1$ , is potentially able to be estimated in separate experiments (23); it characterizes the conversion of the labeled to the unlabeled species and accordingly rate equations must be written for each label-state of the various species.

In the NMR experiment, the signal-sampling RF pulse nutates a small fraction of the longitudinal magnetization into the transverse plane for detection (24), and it is lost thereafter. The removal of this magnetization (the amount depends on the cosine of the pulse angle) in discrete steps during the time course of spectral acquisition must also be expressed in the model function. See Pagès and Kuchel (25) for a detailed description of the different parameters that are considered when constructing such a kinetic model.

### Overall reaction scheme

Fig. 1 shows the basic reaction scheme that describes the exchange of hyperpolarized urea, denoted by  $\text{U}^*$ , and its nonhyperpolarized counterpart,  $\text{U}$ , between the extra- and intracellular compartments in an RBC suspension. The differential equations that describe the kinetics of this reaction scheme were written using the conventional principle of mass action (26,27).

If the system were in homogeneous free solution, its time dependence could be described as follows, where the square brackets denote concentration ( $\text{mol L}^{-1}$ ) and the subscripts e and i denote extra- and intracellular, respectively:

$$\begin{aligned} \frac{d[\text{U}_e^*]}{dt} &= -\left(\frac{1}{T_{1,e}} + v_e^\dagger\right)[\text{U}_e^*] + v_i^\dagger[\text{U}_i^*], \\ \frac{d[\text{U}_e]}{dt} &= \frac{1}{T_{1,e}}[\text{U}_e^*] - v_e^\dagger[\text{U}_e] + v_i^\dagger[\text{U}_i], \\ \frac{d[\text{U}_i^*]}{dt} &= -\left(\frac{1}{T_{1,i}} + v_i^\dagger\right)[\text{U}_i^*] + v_e^\dagger[\text{U}_e^*], \\ \frac{d[\text{U}_i]}{dt} &= \frac{1}{T_{1,i}}[\text{U}_i^*] - v_i^\dagger[\text{U}_i] + v_e^\dagger[\text{U}_e]. \end{aligned} \quad (1)$$

The rate constant that characterizes the transport in the forward direction is denoted by  $v_e^\dagger$  (an abbreviation for

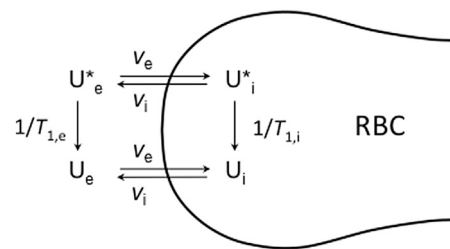

FIGURE 1 Schematic representation of the exchange of hyperpolarized and nonhyperpolarized  $^{13}\text{C}$ -urea across the plasma membrane of an RBC. The velocities (reaction rates) are denoted by  $v_e$  and  $v_i$  for the extra-to-intracellular direction and vice versa, respectively; and the longitudinal relaxation rate constants for  $^{13}\text{C}$ -urea in the extra- and intracellular compartments are denoted by  $1/T_{1,e}$  and  $1/T_{1,i}$ , respectively.

$v_{e \rightarrow i}$ ; units  $\text{mol L}^{-1} \text{s}^{-1}$ ) and in the reverse direction by  $v_i^\dagger$ , while the longitudinal relaxation time constants in the respective compartments are denoted by  $T_{1,e}$  and  $T_{1,i}$ .

Account must be taken of the partitioning of the urea into the two compartments, extra- and intracellular (if there were more compartments, more equations would be required; see Discussion); therefore, it is expedient to write the differential equations in terms of mole amounts and not concentrations. Once the amounts are known at any time, by numerical integration of the differential equations, the concentration in each compartment can be calculated by knowing the volume of the compartment. This approach caters for changes in compartment volume (cell volume changes) that can occur in these types of experiments (22,28).

### Four-state transmembrane carrier

Fig. 2 shows the reaction scheme for a simple four-state carrier in which both the loaded and unloaded carriers exchange binding sites (this corresponds to a conformational change, or isomerization, of the protein) between the interior and the exterior faces (and vice versa) of the plasma membrane (29).

The reaction scheme has corresponding steady-state rate equations for influx and efflux of the solute. Such steady-state equations can be derived by using symbolic algebraic programs such as Rateequationderiver written in the software *Mathematica*, and described in Mulquiney and Kuchel (28). Thus we obtained the expression for the velocity, or rate, of influx,  $v_e$ ,

$$v_e = \frac{[C_{\text{tot},e}][\text{U}_e] k_1 k_2 k_3 k_4}{(k_{-2} k_{-1} + k_3 (k_{-1} + k_2))(k_4 + k_{-4}) + [\text{U}_e] k_1 (k_4 (k_{-2} + k_3) + k_2 (k_3 + k_4)) + [\text{U}_i] k_{-3} (k_{-2} k_{-1} + k_{-4} (k_{-2} + k_{-1} + k_2)) + [\text{U}_e][\text{U}_i] k_{-3} k_1 (k_{-2} + k_2)}, \quad (2)$$

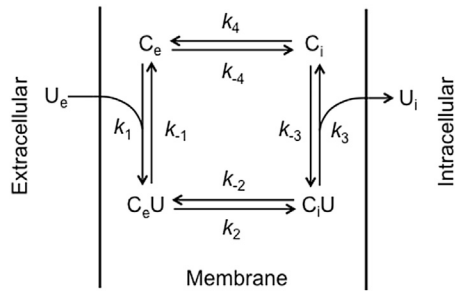

FIGURE 2 Representation of a four-state transmembrane-exchange carrier. The carrier protein is denoted by C, and the subscripts e and i refer to the extra- and intracellular compartments, respectively; similarly for urea (U) in each compartment.

where  $[C_{\text{tot},e}]$  is the total concentration of the carrier in the membrane, averaged over the volume of the external compartment; this assumes rapid solute mixing on a time-scale much smaller than for the NMR measurement, i.e., subsecond. The values  $[U_e]$  and  $[U_i]$  are the urea concentrations in the extra- and intracellular compartments, respectively, and  $k_{\pm i}$ ,  $i = 1, \dots, 4$  are the unitary rate constants that define the reactant flux via the various reactions. The efflux velocity,  $v_i$ , is related to the influx velocity via the ratio of the two urea concentrations and the overall equilibrium constant, as follows:

$$K_{\text{eq}} = \frac{k_1 k_2 k_3 k_4}{k_{-1} k_{-2} k_{-3} k_{-4}}, \quad (3)$$

thus,

$$v_i = \frac{v_e [U_i]}{K_{\text{eq}} [U_e]}. \quad (4)$$

By deriving expressions for the relationships between the unitary rate constants and the steady-state parameters, Eq. 2 can be written as

$$v_e = \frac{[C_{\text{tot},e}] k_{\text{cat},e} [U_e]}{K_{m,e} + [U_e] + [U_i] \frac{K_{m,e}}{K_{m,i}} + [U_e][U_i] K_{2,e}}, \quad (5)$$

where  $K_{m,e}$  and  $K_{m,i}$  are the respective Michaelis constants for extra- and intracellular urea,  $K_{2,e}$  is a cross term that characterizes and distinguishes a pore from a carrier (29), and  $k_{\text{cat},e}$  is the turnover number for the outward facing carrier. The expressions for the steady-state parameters given in terms of the unitary rate constants are

$$V_{\text{max},e} = [C_{\text{tot},e}] k_{\text{cat},e} = \frac{[C_{\text{tot},e}] k_2 k_3 k_4}{k_4(k_{-2} + k_3) + k_2(k_3 + k_4)}, \quad (6)$$

$$K_{m,e} = \frac{(k_{-2} k_{-1} + k_3(k_{-1} + k_2))(k_4 + k_{-4})}{k_1(k_4(k_{-2} + k_3) + k_2(k_3 + k_4))}, \quad (7)$$

and

$$K_{2,e} = \frac{k_{-3}(k_{-2} + k_2)}{k_4(k_{-2} + k_3) + k_2(k_3 + k_4)}. \quad (8)$$

Similarly, the expression for steady-state efflux and the details of the steady-state parameters in terms of the unitary rate constants are

$$v_i = \frac{[C_{\text{tot},i}] k_{\text{cat},i} [U_i]}{K_{m,i} + [U_e] \frac{K_{m,i}}{K_{m,e}} + [U_i] + [U_e][U_i] K_{2,i}}, \quad (9)$$

$$V_{\text{max},i} = [C_{\text{tot},i}] k_{\text{cat},i} = \frac{[C_{\text{tot},i}] k_{-1} k_{-2} k_{-4}}{k_{-2} k_{-1} + k_{-4}(k_{-2} + k_{-1} + k_2)}, \quad (10)$$

$$K_{m,i} = \frac{(k_{-2} k_{-1} + k_3(k_{-1} + k_2))(k_4 + k_{-4})}{k_{-3}(k_{-2} k_{-1} + k_4(k_{-2} + k_{-1} + k_2))}, \quad (11)$$

and

$$K_{2,i} = \frac{k_1(k_{-2} + k_2)}{k_{-2} k_{-1} + k_{-4}(k_{-2} + k_{-1} + k_2)}. \quad (12)$$

The rate constants (with superscript daggers)  $v_e^\dagger$  and  $v_i^\dagger$  in Fig. 1 and Eq. 1 are given by the expressions for  $v_e$  and  $v_i$  without the  $[U_e]$  or  $[U_i]$  in the respective numerator.

### Simplification—elimination of the cross term

The cross term in the rate expressions (Eqs. 5 and 9), i.e., those containing  $[U_e][U_i]$ , describes a nonlinear (degree 2) response to substrate concentration that is over and above the usual rectangular hyperbolic response of a conventional Michaelis-Menten-type enzyme. However, if the rates of interchange between the extra- and intracellular carriers are much greater than the on- and off-rates of urea from the carrier, i.e.,  $\{k_4, k_{-4}, k_2, k_{-2}\} \gg \{k_1, k_{-1}, k_3, k_{-3}\}$ , then it is readily seen that Eqs. 5 and 9 reduce to the classical product-inhibited Michaelis-Menten equation. (This can be seen by supposing that the values of the rate constants in each set are the same, so  $K_{2,e}$ , and  $K_{2,i}$  take on values of the same order of magnitude as  $k_{-3}/k_4$  and  $k_1/k_{-4}$ , and the larger the value of  $k_4$  or  $k_{-4}$ , the smaller are the values of  $K_{2,e}$ , and  $K_{2,i}$ .) In other words, if the exchange rate of the carrier (both loaded and unloaded) is high, the rate equation becomes that of a product-inhibited Michaelis-Menten type,

$$v_e = \frac{[C_{\text{tot},e}] k_{\text{cat},e} [U_e]}{K_{m,e} \left( 1 + \frac{[U_i]}{K_{m,i}} \right) + [U_e]}, \quad (13)$$

where  $K_{m,i}$  and  $[U_i]$  are the counterparts of the product inhibition constant and product concentration, respectively; and

by symmetry the velocity of the reverse overall reaction is described by

$$v_i = \frac{[C_{\text{tot},i}]k_{\text{cat},i}[U_i]}{K_{m,i}\left(1 + \frac{[U_e]}{K_{m,e}}\right) + [U_i]} \quad (14)$$

These carrier equation forms were used to analyze [2, <sup>19</sup>F] 2-deoxy-D-glucose exchange in human RBCs using <sup>19</sup>F NMR spectroscopy (30).

### Carrier concentration

We interpret the meaning of the total concentration of the membrane carrier as follows:  $\eta$  is the number of carrier molecules per RBC ( $\sim 14,000 [\text{RBC}]^{-1}$ ) (31);  $n$  is the number of RBCs in the sample namely  $V_{\text{sample}} Ht/MCV$ ;  $MCV$  is the mean cell volume (86 fL) (32); and  $N$  is Avogadro's number.

In the extracellular volume, therefore, the effective total concentration of the carrier is

$$[C_{\text{tot},e}] = V_{\text{sample}} Ht \eta / (MCV N V_e), \quad (15)$$

where  $V_e$  is the extracellular volume. The corresponding expression for  $[C_{\text{tot},i}]$  has  $V_i$  instead of  $V_e$  in Eq. 15. Furthermore, if the equilibrium constant of the exchange reaction is  $K_{\text{eq}} = 1$ , then a mathematically useful pair of relationships is

$$v_e = \frac{[C_{\text{tot},e}]k_{\text{cat},e}[U_e]}{K_{m,e} + [U_e] + [U_i]\rho + [U_e][U_i]K_{2,e}}, \quad (16)$$

$$\begin{aligned} v_i &= \frac{[C_{\text{tot},i}] \frac{k_{\text{cat},e}}{\rho} [U_i]}{\frac{K_{m,e}}{\rho} + \frac{[U_e]}{\rho} + [U_i] + [U_e][U_i] \frac{K_{2,e}}{\rho}} \\ &= \frac{[C_{\text{tot},i}] \frac{V_e}{V_i} k_{\text{cat},e} [U_i]}{K_{m,e} + [U_e] + [U_i]\rho + [U_e][U_i]K_{2,e}}. \end{aligned} \quad (17)$$

Thus, the flux in either direction across the membrane is characterized by only four independent steady-state kinetic parameters,  $k_{\text{cat},e}$ ,  $K_{m,e}$ ,  $K_{2,e}$ , and  $\rho = K_{m,e}/K_{m,i} = K_{2,e}/K_{2,i}$ . (To check the analysis, we multiply Eq. 14 by  $V_e$  and Eq. 17 by  $V_i$  and obtain the flux in  $\text{mol s}^{-1}$  in either direction across the membrane; at equilibrium  $[U_e] = [U_i]$ , making  $v_e = v_i$ , as required.)

Overall, this section enables the interpretation of the estimates of the maximal velocities in terms of the number of transporters per cell, and their turnover number.

### Markov chain Monte Carlo algorithm

The fitting of the model to the experimental data used a Bayesian type of analysis (33,34). In this approach each

model  $H_i$  ( $H$  stands for hypothesis) is assumed to have a vector of parameter values  $\mathbf{w}$ . A model is defined by its functional form and two probability distributions:

1. A prior distribution  $P(\mathbf{w}|H_i)$  that states which values the parameters can plausibly take; and
2. The predictions  $P(D|\mathbf{w}, H_i)$  that the model makes about the data when  $\mathbf{w}$  is a particular set of values (35).

Prior information in this work was that the  $T_1$  of <sup>13</sup>C-urea outside the RBCs in the suspension was not larger than that of <sup>13</sup>C-urea in PBS alone, 44 s (23); and the  $T_1$  of the intracellular <sup>13</sup>C-urea was smaller than that of extracellular <sup>13</sup>C-urea. If any of these conditions were violated in the process of sampling parameter space by using the Markov Chain Monte Carlo (MCMC) method then the probability of this parameter set was assigned the value zero. The Metropolis-Hastings MCMC algorithm (36,37) yielded estimates of mean values and standard deviations of the parameters (38–40). The program was implemented in the software *Mathematica* (19) and has been described in detail (20–22).

Duplicate experiments were analyzed simultaneously with initial estimates of the fitted parameters entered into the program, and sampling of parameter space was performed with 25,000 iterations with maximum incremental steps of the various values of 1.0%. Tables 1 and 2 summarize the floated parameters and their estimates, respectively.

## RESULTS

### Hyperpolarized <sup>13</sup>C-urea injected into RBC suspensions

Fig. 3 shows a typical NMR spectrum of hyperpolarized <sup>13</sup>C-urea in the presence of shrunken RBCs. The two partially resolved resonances are from the extra- (larger chemical shift) and intracellular (smaller chemical shift) urea (1). The resolution between both signals was incomplete, so the spectra were numerically deconvoluted as described in Materials and Methods (18,41). All NMR experiments performed at the same temperature were

**TABLE 1** Parameters used to fit the experimental data with the Bayesian-MCMC approach

| Description                                             | Remark                                                                                |
|---------------------------------------------------------|---------------------------------------------------------------------------------------|
| Maximum parameter increment                             | 1.0%                                                                                  |
| Number of iterations                                    | 25,000                                                                                |
| Prior constraints                                       | All parameters $>0$ , $T_{1,e} < 44 \text{ s}$ , <sup>a</sup> and $T_{1,i} < T_{1,e}$ |
| RF pulse angle                                          | 4°                                                                                    |
| Delay between urea addition and start of the experiment | As measured for each experiment (between 2 and 5 s)                                   |
| Cutoff from burn-in period                              | 30%                                                                                   |

<sup>a</sup> $T_1$  value of <sup>13</sup>C urea in PBS at 400 MHz (23).

**TABLE 2** Average values of the floated parameters after the Bayesian-MCMC analysis and estimates of  $K_{\text{app,eq}}$ 

| Temperature                                    | 20°C           |               |                  | 37°C        |               |                  |
|------------------------------------------------|----------------|---------------|------------------|-------------|---------------|------------------|
|                                                | 2 mL           | 1 mL          | 1 mL + cold urea | 2 mL        | 1 mL          | 1 mL + cold urea |
| $T_{1,e}$ (s)                                  | $14.4 \pm 0.3$ | $32 \pm 4$    | $19 \pm 3$       | $32 \pm 4$  | $41 \pm 2$    | $39 \pm 3$       |
| $T_{1,i}$ (s)                                  | $13.0 \pm 0.6$ | $3.1 \pm 0.1$ | $4.5 \pm 0.5$    | $10 \pm 1$  | $9.1 \pm 0.3$ | $9.2 \pm 0.5$    |
| $K_{m,e}$ (mmol L $^{-1}$ )                    | $42 \pm 5$     | $48 \pm 10$   | $27 \pm 4$       | $38 \pm 10$ | $33 \pm 8$    | $35 \pm 10$      |
| $K_{m,i}$ (mmol L $^{-1}$ )                    | $11 \pm 2$     | $12 \pm 3$    | $15 \pm 5$       | $14 \pm 4$  | $18 \pm 5$    | $30 \pm 10$      |
| $K_{\text{app,eq}}$ (mmol L $^{-1}$ )          | 141            | 146           | 106              | 130         | 80            | 76               |
| $V_{\text{max,e}}$ (mmol L $^{-1}$ s $^{-1}$ ) | $5.8 \pm 0.7$  | $33 \pm 2$    | $18.2 \pm 0.9$   | $22 \pm 3$  | $16 \pm 1$    | $18 \pm 2$       |

deconvoluted initially without prior knowledge or assumptions about the number of resonances.

### Spectral deconvolution

The best fits, across a complete data set recorded at a given temperature (i.e., five and six experiments at 37 and 20°C, respectively) were obtained by using a three-peak model for which two of the peaks perfectly overlapped the extra- and intracellular resonances. The deconvoluted spectra overlapped the experimental data (Fig. 3 *a*) almost perfectly, and only a minor frequency shift was observed between the fitted and experimental signals. The line-width of the third deconvoluted resonance was significantly greater than the other two and had a chemical shift between them at 37°C, and it was overlapped by the extracellular peak in the spectra recorded at 20°C. The area of the residual after fitting was small, as illustrated in Fig. 3 *b*. The peak areas

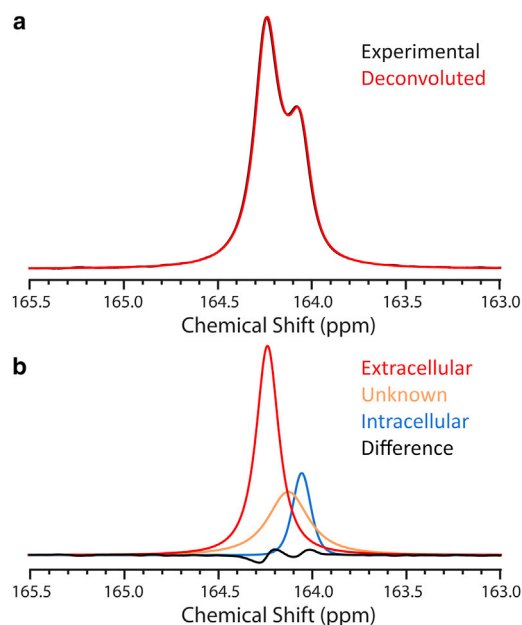

**FIGURE 3** (*a*) Experimental and deconvoluted  $^{13}\text{C}$  NMR spectrum after addition of 2 mL of hyperpolarized  $^{13}\text{C}$ -urea (70 mM) into 2 mL of RBCs ( $H_t = 95\%$ ) at 37°C. The signal deconvolution was performed by using a three-peak model. (*b*) Individual components of the deconvoluted experimental spectrum. To see this figure in color, go online.

obtained from the deconvolutions represented the evolution of the amounts of urea in each compartment during the time course. Because the unknown signal had the same chemical shift as the extracellular urea in experiments done at 20°C, we deemed it to be part of the extracellular pool (see Discussion).

Fig. 4 shows the quantity (obtained from the relative-area estimates) of the intra- and extracellular hyperpolarized urea after injecting different initial amounts of hyperpolarized  $^{13}\text{C}$ -urea. Whereas the extracellular amounts varied from one experiments to the next, the maximum  $^{13}\text{C}$ -urea signal from inside the cells became almost the same in all experiments.

### Model fitting

The complete four-state model was fitted to the signal areas obtained from the deconvolutions. Although the fittings of the experimental data were statistically satisfactory (fitted well visually), we did not obtain consistent estimates of the steady-state kinetic parameters. In other words, even the robust MCMC method could not handle the low sensitivity of the fitting to values of the cross-constant,  $K_{2,e}$ . Low sensitivities of simulated time courses to changes in the value of this parameter are shown in the Section S4 in the Supporting Material. Almost no change

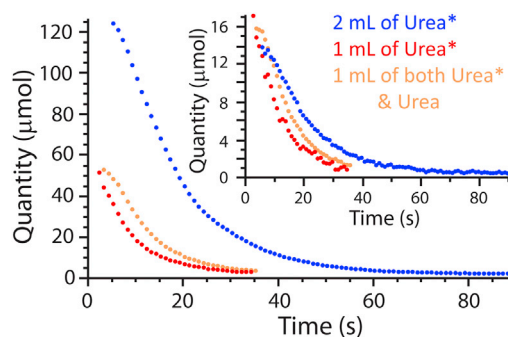

**FIGURE 4** Evolution of the amount of hyperpolarized  $^{13}\text{C}$ -urea in 2 mL of RBCs at 20°C as a function of the quantity of added hyperpolarized (denoted Urea\*) or unlabeled (denoted Urea)  $^{13}\text{C}$ -urea. The main plot shows the evolution of the amount of extracellular hyperpolarized  $^{13}\text{C}$ -urea; (*inset*) amount of intracellular hyperpolarized  $^{13}\text{C}$ -urea. To see this figure in color, go online.

in signal evolution trajectory was seen when  $K_{2,c}$  was varied by five orders of magnitude. Therefore we mathematically reduced the initial model and fitted the data by concluding that protein isomerization is very fast relative to the binding and dissociation steps of the reaction (see above), thus leading to a rate equation that is identical to the product-inhibited Michaelis-Menten equation (Eqs. 13 and 14). Fig. 5 shows representative data fitting for each of 25 and 37°C, and Table 2 summarizes the parameter estimates. All fitted data sets are shown in Section S3 in the Supporting Material.

## DISCUSSION

### Spectral deconvolution

Previous estimates of the rate of urea transport into RBCs (either by  $^{13}\text{C}$  NMR or by  $^{14}\text{C}$  radioactivity measurements) were carried out under conditions of equilibrium exchange (1,11,42). By using hyperpolarized urea, we were able to study the system when it was initially under nonequilibrium conditions, on the 1-s timescale. In other words, it was initially under zero-*trans* conditions (2). To enhance the resolution of the two  $^{13}\text{C}$  NMR resonances the RBCs were osmotically shrunk using buffer conditions that we had used previously (1). However, the

NMR spectral resolution is still incomplete, so we used the band-target entropy minimization method deconvolution algorithm that has no preconceptions about the number of peaks and their relative areas; our conclusion after studying systematic deviations of fitting the model to various data sets was that three peaks best described the data. Two of the fitted peaks overlapped with those of extra- and intracellular urea whereas the third, broader one, lay between both signals for the data recorded at 37°C; but it was overlapped by the extracellular peak for those recorded at 20°C. The signal deconvolution was excellent with only a slight frequency shift of the fitted function. This small shift was responsible for the oscillating residual signal of low net area (Fig. 3 b). Specifically, the left- and right-hand sides of the two peaks in the NMR spectra had steep slopes, so even minor frequency shifts in the fitted function led to relatively large excursions in the residuals. However, the relative differences between deconvoluted and experimental peak areas were typically <0.1%.

### Mechanisms for the fitted third peak

Seven plausible mechanisms for generating the third peak on fitting the data from hyperpolarized  $^{13}\text{C}$ -urea in RBC suspensions were:

1. Heterogeneity in the extent of shrinkage of the cells;
2. A pool in the extra- or intracellular compartments that remained unmixed with the others up to 2 min after injection;
3. A pool in the membranes of the cells that only slowly exchanged with the other two pools over the subsequent 2 min;
4. Adsorption of urea onto hemoglobin (and other less abundant proteins) inside the cell;
5. Rapid exchange line-broadening brought about by association of urea with the extracellular surface of the RBCs;
6.  $\text{Gd}^{3+}$  in the DNP solution that could associate with extracellular components and give rise to two (or more) rates of relaxation and line broadening; and
7. RBC reorientation in the magnetic field,  $\mathbf{B}_0$ , of the NMR spectrometer that takes place on a timescale similar to that of the DNP experiment (alignment with  $\mathbf{B}_0$  is the basis of a higher resolution than might otherwise be expected for  $^1\text{H}$ -spin-echo spectra of static samples of RBCs (43)).

A consequence of all the above factors is that there is not a single physical explanation for the third peak, and that it probably only has empirical meaning at this stage; thus, the combination of the third peak with that of the extracellular one described the overall line-shape better (in a statistical sense) than a single Lorentzian function.

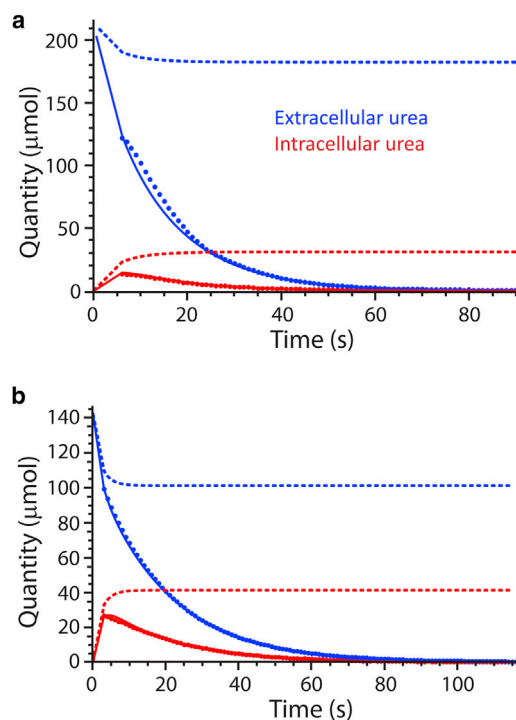

FIGURE 5 Addition of 2 mL of hyperpolarized urea to 2 mL of RBCs at (a) 20°C; and (b) 37°C. Data points were obtained from the deconvolution of the experimental NMR spectra. (Solid and dashed lines) Evolution of the hyperpolarized and total species (both hyperpolarized and nonhyperpolarized) obtained after the MCMC fitting, using the fast-isomerization carrier model. To see this figure in color, go online.

## Arguments for particular mechanisms

### *Mechanism 1*

This mechanism is unlikely to be a major contributor to the nonideal spectral line shape in this case, because previous studies carried out under equilibrium-exchange conditions did not reveal a third peak (1). In addition, dimethyl methylphosphonate added to RBCs in a range of cell volumes encompassing those used in this work shows only two well-resolved peaks in  $^{31}\text{P}$  NMR spectra of the solute. Because dimethyl methylphosphonate is known to have a chemical shift that is a strictly-decreasing function of cell volume (44–47), a distribution of cell volumes would produce a broadened intracellular peak; under these buffer conditions, it did not occur.

### *Mechanism 2*

If the third peak resulted from incomplete mixing of the hyperpolarized  $^{13}\text{C}$ -urea, this might occur in either compartment. Flow-induced distortion of the RBCs can take place, like that in blood flowing in blood vessels. Hence, the third peak could arise if there were a distribution of cytoplasmic mixing efficiencies. Because the third peak arose immediately after injecting the hyperpolarized  $^{13}\text{C}$ -urea, and did not grow like the intracellular peak, this suggests that it had an extracellular origin.

### *Mechanism 3*

Because the third peak had a relative area of up to 10% of the total area of the signal this was unlikely to be ascribed to a pool in the membranes, because the total volume of the phospholipid membrane relative to the cytoplasmic volume of an RBC is very small. This can be estimated as follows: the surface area of a human RBC is  $\sim 143 \mu\text{m}^2$  (44); the volume in isotonic conditions is  $\sim 86$  fL (32); and the thickness of a phospholipid bilayer is  $\sim 5$  nm (27). Thus, the volume of the bilayer is  $\sim 0.8\%$  of the cell volume. The RBCs in this work had a mean volume of  $\sim 64$  fL, therefore the phospholipid bilayer volume was 1.1% of each cell, and yet in a sample with  $Ht \sim 30\%$ , the membrane compartment volume would have been  $< 1\%$  of the total sample volume. The partition coefficient of urea in lipids is also very low (48), so it is unlikely that the urea had become concentrated in the phospholipid bilayer. And, given the physical-chemical properties of membrane transport proteins, they do not partition their transported solutes into a significant pool.

### *Mechanisms 4 and 5*

Chemical exchange that is intermediate on the NMR time-scale will give rise to line broadening. This could result from association of urea with the extracellular glycocalyx of the RBCs, and it is an aspect that is amenable to further study by using RBC ghosts (i.e., RBCs depleted of hemoglobin but with an intact plasma membrane). Although

line-broadening could be studied with ghosts, the separation of the two peaks requires a high protein concentration inside the cells. Hence, ghosts cannot be used in studies of membrane transport (exploiting the split-peak phenomenon) unless a high concentration of protein is added outside them.

### *Mechanism 6*

The omission of  $\text{Gd}^{3+}$  from the DNP solution still enabled hyperpolarization of the  $^{13}\text{C}$ -urea but its exclusion made no difference to the optimal fitting function of the emergent  $^{13}\text{C}$  NMR spectra, which remained at three peaks (data not shown).

One-dimensional  $^1\text{H}$  imaging profile experiments were performed (see additional discussion in Section S2 in the [Supporting Material](#)) to investigate the possible origin of two extracellular pools. From these experiments, it appeared that convection (resulting from thermal gradients) could account for the differences in one-dimensional  $^1\text{H}$  NMR imaging profiles of water.

Furthermore, the area of the third peak decayed in a manner similar to the intra- and extracellular signals. This should not have been the case if it was due to sample heterogeneity, which would give rise to a distribution of populations, hence multiple peaks. Thus, the third peak was deemed to result from alterations of the extracellular peak shape from the ideal Lorentzian (or even Gaussian) shape, brought about largely by convection in the sample.

### *Mechanism 7*

Overall, we concluded that the third peak in the analysis of the spectra was from the extracellular population of  $^{13}\text{C}$ -urea arising from flow-convection, heterogeneity in the distribution of the solute (i.e., incomplete mixing of the hyperpolarized solution when it was injected into the densely packed RBCs), thermal gradients, cell reorientation, and most probably all such mechanisms together. The thermostated delivery system (described in detail in Section S1 in the [Supporting Material](#)) was designed to achieve thermal homogeneity in the sample, but the fact that the  $20^\circ\text{C}$  data had the third peak residing under the extracellular one, and the fact that it was shifted to lower frequency in the  $37^\circ\text{C}$  data, suggested a significant thermal contribution to the origin of the third unresolved peak.

## Comparison with other biochemical systems

At  $t = 0$ , there was no hyperpolarized intracellular  $^{13}\text{C}$ -urea, so the signal should have increased from the beginning of the time course. It is evident from [Fig. 3](#) that despite care given to the rapid injection (in  $< 3$  s) of the hyperpolarized  $^{13}\text{C}$ -urea, we were unable to catch the buildup of the intracellular signal; this highlights the very fast transport of urea across the RBC membrane. This contrasts with the slower buildup of other hyperpolarized  $^{13}\text{C}$ -solute in cells and tissues (4,5,7,9). Under hyperpolarized



conditions, the observed signal is the result of a competition between the natural spin relaxation and the chemical conversion of molecules. Although the intracellular signal buildup was not observed, the kinetic equilibrium was not reached for the first several seconds after the start of the acquisition. This is highlighted by the sum of the observable (hyperpolarized) and nonobservable signal for each pool (Fig. 5, dashed lines) seen in the simulations of the reaction scheme, using the parameter values obtained from the MCMC fitting.

### Data fitting—general

The fitting of the complete four-state carrier model did not give robust and reliable estimates of the values of the kinetic constants. After several experiments we were led to conclude that urea transport was inhibited by the *trans* population of urea, so a product-inhibition-like Michaelis-Menten equation was justified. Despite the injection of various amounts of hyperpolarized urea with or without unlabeled urea, already at equilibrium between the two pools, the maximum quantity of intracellular urea was similar for all experiments (Fig. 4). Simulating signal evolution with a set of values for one specific parameter (see Section S4 in the Supporting Material) showed the low influence of the isomerization rate of the carrier on the signal time course. On the other hand, parameter estimates obtained by using the simpler model gave reproducible values with small standard deviations, with similar estimates from a range of initial experimental conditions.

### Data fitting—actual values

To compare our estimates of the maximum velocities of urea exchange,  $V_{\max,e}$  and  $V_{\max,i}$ , with previously published values (1,42), we expressed the parameters as a function of the total surface area of RBCs in the sample, considering a cell surface area of  $143 \mu\text{m}^2$  (41). In the forward direction, the maximum velocity of the reaction,  $V_{\max,e}$ , lay between  $6.1$  and  $8.4 \times 10^{-7}$  and  $2.3$  and  $13.2 \times 10^{-7} \text{ mol s}^{-1} \text{ cm}^{-2}$  at  $37$  and  $20^\circ\text{C}$ , respectively. Thus, there was insignificant difference in the values for both temperatures. The fitted values were of the same order of magnitude as given in Karan and Macey (42) ( $1.14 \times 10^{-7}$  and  $4.51 \times 10^{-7}$  at  $21$  and  $43^\circ\text{C}$ , respectively) and in other studies (11,12,49). However, these values are an order-of-magnitude larger than those reported previously for the system under equilibrium-exchange using  $^{13}\text{C}$  NMR band-shape analysis (1). The explanation for this discrepancy is that the value of the apparent Michaelis constant,  $K_{\text{app},e}$ , is dependent on the urea concentration on the opposite side of the membrane:

$$K_{\text{app},e} = K_{\text{m},e} \left( 1 + \frac{[\text{U}_i]}{K_{\text{m},i}} \right). \quad (18)$$

At equilibrium, the  $K_{\text{app},e}$  values were  $\sim 140$  and  $\sim 80 \text{ mmol L}^{-1}$  at  $20$  and  $37^\circ\text{C}$ , respectively (Table 2). The estimates at  $20^\circ\text{C}$  are  $\sim 5$  and  $\sim 2$  times lower than the values reported by Karan and Macey (42), Yousef and Macey (49), and Brahm (11), but of the same order of magnitude as the measurement of Mayrand and Levitt (12); and  $\sim 3$  times lower than our previous estimate (1). As the temperature increased, the estimates of  $K_{\text{app},e}$  decreased, an opposite trend to what was reported in Brahm (11) and Karan and Macey (42).

### Permeability and turnover number estimates

Despite the discrepancies in the estimates on  $V_{\max}$  and  $K_{\text{m}}$  among the published articles (1,11,12,42,49), the limiting permeability  $P_0$  ( $V_{\max}/K_{\text{m}}$ ) was of the same order of magnitude ( $\sim 2 \times 10^{-4} \text{ cm s}^{-1}$  at  $25^\circ\text{C}$ ) due to a similar difference in the estimates of both parameters, but with the same ratio. This similarity of  $P_0$  values suggests that shrinking the cells for the NMR experiments did not affect the exchange kinetics. We calculated  $P_0$  from the equilibrium-exchange apparent Michaelis constants and estimated it to be higher than the previous values, i.e., between  $6.5$  and  $9.0 \times 10^{-3} \text{ cm s}^{-1}$ .

In addition, the turnover number of each transport protein can be calculated from Eqs. 13–15 using the numerical values of the various cytological parameters for the RBCs used in the experiment. Thus the turnover per active site was estimated to be  $\sim 10,000 \text{ s}^{-1}$  for the  $\sim 14,000$  (15) transporters per RBC. This is a useful value for modeling urea exchange in other cell types, provided an estimate of the number of urea transporters per cell is available because the turnover numbers of various transporter isoforms are likely to be similar.

### CONCLUSIONS

We used the high polarization level achievable with the RD-DNP technique to study the permeability of erythrocytes to  $^{13}\text{C}$ -urea, on the 1-s to 2-min timescale. By taking into account the different physical and chemical parameters involved in the  $^{13}\text{C}$  NMR signal evolution, we were able to fit the  $^{13}\text{C}$  NMR spectral data and interpret the kinetic parameters in terms of a mechanistic model of the transport protein. We demonstrated that the addition of a high concentration of urea inhibits its own transport. The estimates of the kinetic parameters in some cases agreed with those already in the literature, obtained with other methods and under different experimental conditions. New estimates of values of the kinetic constants and the mechanistic model can now be used to investigate the distribution of  $^{13}\text{C}$ -urea in blood in vivo and, potentially, when other tissues are studied in a similar way, the whole body.

## SUPPORTING MATERIAL

Seven figures, one table and supplemental information are available at [http://www.biophysj.org/biophysj/supplemental/S0006-3495\(13\)01082-5](http://www.biophysj.org/biophysj/supplemental/S0006-3495(13)01082-5).

We thank Ms. Hu Qiaolan of the Clinical Imaging Research Centre for some of the venipuncture, Dr. Philip Lee for preliminary work on the HyperSense, and Professor Michael Field for information and discussion on renal blood flow.

The work was funded by an intramural grant from the Singapore Bioimaging Consortium, an Australian Research Council Discovery Project grant (No. DP0986316 to P.W.K.), and an Australian Postgraduate Award (to M.P.).

## REFERENCES

- Potts, J. R., B. T. Bulliman, and P. W. Kuchel. 1992. Urea exchange across the human erythrocyte membrane measured using  $^{13}\text{C}$  NMR lineshape analysis. *Eur. Biophys. J.* 21:207–216.
- Leib, W. R. 1982. A kinetic approach to transport studies. In *Red Cell Membranes, A Methodological Approach*. Vol. 8, Biological Techniques Series. J. C. Ellory and J. D. Young, editors. Academic Press, London, United Kingdom, pp. 135–164.
- Ardenkjaer-Larsen, J. H., B. Fridlund, ..., K. Golman. 2003. Increase in signal-to-noise ratio of  $> 10,000$  times in liquid-state NMR. *Proc. Natl. Acad. Sci. USA*. 100:10158–10163.
- Day, S. E., M. I. Kettunen, ..., K. M. Brindle. 2007. Detecting tumor response to treatment using hyperpolarized  $^{13}\text{C}$  magnetic resonance imaging and spectroscopy. *Nat. Med.* 13:1382–1387.
- Gallagher, F. A., M. I. Kettunen, ..., K. M. Brindle. 2008. Magnetic resonance imaging of pH in vivo using hyperpolarized  $^{13}\text{C}$ -labeled bicarbonate. *Nature*. 453:940–943.
- Marjańska, M., I. Iltis, ..., P.-G. Henry. 2010. In vivo  $^{13}\text{C}$  spectroscopy in the rat brain using hyperpolarized  $[1-^{13}\text{C}]$ pyruvate and  $[2-^{13}\text{C}]$ pyruvate. *J. Magn. Reson.* 206:210–218.
- Bohndiek, S. E., M. I. Kettunen, ..., K. M. Brindle. 2011. Hyperpolarized  $[1-^{13}\text{C}]$ -ascorbic and dehydroascorbic acid: vitamin C as a probe for imaging redox status in vivo. *J. Am. Chem. Soc.* 133:11795–11801.
- Harris, T., G. Eliyahu, ..., H. Degani. 2009. Kinetics of hyperpolarized  $^{13}\text{C}(1)$ -pyruvate transport and metabolism in living human breast cancer cells. *Proc. Natl. Acad. Sci. USA*. 106:18131–18136.
- Witney, T. H., M. I. Kettunen, and K. M. Brindle. 2011. Kinetic modeling of hyperpolarized  $^{13}\text{C}$  label exchange between pyruvate and lactate in tumor cells. *J. Biol. Chem.* 286:24572–24580.
- Harrison, C., C. Yang, ..., C. R. Malloy. 2012. Comparison of kinetic models for analysis of pyruvate-to-lactate exchange by hyperpolarized  $^{13}\text{C}$  NMR. *NMR Biomed.* 25:1286–1294.
- Brahm, J. 1983. Urea permeability of human red cells. *J. Gen. Physiol.* 82:1–23.
- Mayrand, R. R., and D. G. Levitt. 1983. Urea and ethylene glycol-facilitated transport systems in the human red cell membrane. Saturation, competition, and asymmetry. *J. Gen. Physiol.* 81:221–237.
- Wolcast, M. 1968. Studies on the regional blood flow with phosphorus-32 labeled red cells and small  $\beta$ -sensitive semiconductor detectors. *Acta Physiol. Scand.* 313 (Suppl.):1–109.
- Wolcast, M. 1973. Renal medullary red cell and plasma flow as studied with labeled indicators and internal detection. *Acta Physiol. Scand.* 88:215–225.
- Ojcus, D. M., and A. K. Solomon. 1988. Sites of *p*-chloromercuribenzenesulfonate inhibition of red cell urea and water transport. *Biochim. Biophys. Acta Biomembr.* 942:73–82.
- Reference deleted in proof.
- Chew, W., E. Widjaja, and M. Garland. 2002. Band-target entropy minimization (BTEM): an advanced method for recovering unknown pure component spectra. Application to the FTIR spectra of unstable organometallic mixtures. *Organometallics*. 21:1982–1990.
- Widjaja, E., C. Li, ..., M. Garland. 2003. Band-target entropy minimization. A robust algorithm for pure component spectral recovery. Application to complex randomized mixtures of six components. *Anal. Chem.* 75:4499–4507.
- Wolfram, S. 2011. The *Mathematica* Book, Ver. 8.0.1.0. Wolfram Media, Champaign, IL.
- Kuchel, P. W., C. Naumann, ..., D. Szekeley. 2011. Relaxation times of spin states of all ranks and orders of quadrupolar nuclei estimated from NMR  $\tau$ -spectra: Markov chain Monte Carlo analysis applied to  $^7\text{Li}^+$  and  $^{23}\text{Na}^+$  in stretched hydrogels. *J. Magn. Reson.* 212:40–46.
- Puckeridge, M., B. E. Chapman, ..., P. W. Kuchel. 2013. Stoichiometric relationship between  $\text{Na}^+$  ions transported and glucose consumed in human erythrocytes: Bayesian analysis of  $^{23}\text{Na}$  and  $^{13}\text{C}$  NMR time course data. *Biophys. J.* 104:1676–1684.
- Puckeridge, M., B. E. Chapman, ..., P. W. Kuchel. 2012. Quantitative model of NMR chemical shifts of  $^{23}\text{Na}^+$  induced by TmDOTP: applications in studies of  $\text{Na}^+$  transport in human erythrocytes. *J. Inorg. Biochem.* 115:211–219.
- Puckeridge, M., G. Pagès, and P. W. Kuchel. 2012. Simultaneous estimation of  $T_1$  and the flip angle in hyperpolarized NMR experiments using acquisition at non-regular time intervals. *J. Magn. Reson.* 222:68–73.
- Gao, J.-H., L. Lemen, ..., P. T. Fox. 1997. Magnetization and diffusion effects in NMR imaging of hyperpolarized substances. *Magn. Reson. Med.* 37:153–158.
- Pagès, G., and P. W. Kuchel. 2013. Mathematical modeling and data analysis of NMR experiments using hyperpolarized  $^{13}\text{C}$  metabolites. *Magn. Reson. Insights*. 6:13–21.
- Kuchel, P. W., and B. E. Chapman. 1983. NMR spin exchange kinetics at equilibrium in membrane transport and enzyme systems. *J. Theor. Biol.* 105:569–589.
- Kuchel, P. W. 2009. *Schaum's Outline of Theory and Problems of Biochemistry*. McGraw-Hill, New York.
- Mulquaney, P. J., and P. W. Kuchel. 2003. *Modeling Metabolism with Mathematica*. CRC Press, Boca Raton, FL.
- Lieb, W. R. 1982. A kinetic approach to transport studied. In *Red Cell Membranes: A Methodological Approach* Academic Press, London, United Kingdom, p. 390.
- Potts, J. R., and P. W. Kuchel. 1992. Anomeric preference of fluoroglucose exchange across human red-cell membranes.  $^{19}\text{F}$ -NMR. studies. *Biochem. J.* 281:753–759.
- Mannuzzu, L. M., M. M. Moronne, and R. I. Macey. 1993. Estimate of the number of urea transport sites in erythrocyte ghosts using a hydrophobic mercurial. *J. Membr. Biol.* 133:85–97.
- Dacie, J. V., and S. M. Lewis. 1975. *Practical Haematology*. Churchill Livingstone, Edinburgh, United Kingdom.
- Jaynes, E. T. 2003. *Probability Theory: The Logic of Science*. Cambridge University Press, Cambridge, United Kingdom.
- Sivia, D. S., and J. Skilling. 2006. *Data Analysis: A Bayesian Tutorial*. Oxford Science Publications, Oxford, United Kingdom.
- MacKay, D. J. C. 1992. Bayesian interpolation. *Neural Comput.* 4:415–447.
- Metropolis, N., A. W. Rosenbluth, ..., E. Teller. 1953. Equations of state calculations by fast computing machines. *J. Chem. Phys.* 21:1087–1092.
- Hastings, W. K. 1970. Monte Carlo sampling methods using Markov chains and their applications. *Biometrika*. 57:97–109.
- Bretthorst, G. L., W. C. Hutton, ..., J. J. H. Ackerman. 2005. Exponential parameter estimation (in NMR) using Bayesian probability theory. *Concepts Magn. Reson.* 27A:55–63.
- Bretthorst, G. L., W. C. Hutton, ..., J. J. H. Ackerman. 2005. Exponential model selection (in NMR) using Bayesian probability theory. *Concepts Magn. Reson.* 27A:64–72.

40. Bretthorst, G. L. 2005. How accurately can parameters from exponential models be estimated? A Bayesian view. *Concepts Magn. Reson.* 27A:73–83.
41. Kirk, K., and P. W. Kuchel. 1986. Equilibrium exchange of dimethyl methylphosphonate across the human red cell membrane measured using NMR spin transfer. *J. Magn. Reson.* 68:311–318.
42. Karan, D. M., and R. I. Macey. 1990. Temperature- and concentration-dependence of urea permeability of human erythrocytes determined by NMR. *Biochim. Biophys. Acta Biomembr.* 1024:271–277.
43. Kuchel, P. W., A. Coy, and P. Stilbs. 1997. NMR “diffusion-diffraction” of water revealing alignment of erythrocytes in a magnetic field and their dimensions and membrane transport characteristics. *Magn. Reson. Med.* 37:637–643.
44. Kirk, K., and P. W. Kuchel. 1985. Red cell volume changes monitored using a new  $^{31}\text{P}$  NMR procedure. *J. Magn. Reson.* 62:568–572.
45. Kirk, K., and P. W. Kuchel. 1988. Physical basis of the effect of hemoglobin on the  $^{31}\text{P}$  NMR chemical shifts of various phosphoryl compounds. *Biochemistry.* 27:8803–8810.
46. Kirk, K., and P. W. Kuchel. 1988. The contribution of magnetic susceptibility effects to transmembrane chemical shift differences in the  $^{31}\text{P}$  NMR spectra of oxygenated erythrocyte suspensions. *J. Biol. Chem.* 263:130–134.
47. Kuchel, P. W., W. A. Bubb, ..., J. Hook. 2004.  $^{31}\text{P}$  MAS-NMR of human erythrocytes: independence of cell volume from angular velocity. *Magn. Reson. Med.* 52:663–668.
48. Finkelstein, A. 1976. Water and nonelectrolyte permeability of lipid bilayer membranes. *J. Gen. Physiol.* 68:127–135.
49. Yousef, L. W., and R. I. Macey. 1989. A method to distinguish between pore and carrier kinetics applied to urea transport across the erythrocyte membrane. *Biochim. Biophys. Acta Biomembr.* 984:281–288.

## **Supporting Material**

### **Transmembrane Exchange of Hyperpolarized $^{13}\text{C}$ -Urea in Human Erythrocytes: Sub-Minute Timescale Kinetic Analysis**

Guilhem Pagès, Max Puckeridge, Guo Liangfeng, Yee Ling Tan, Chacko Jacob, Marc Garland, and Philip W. Kuchel

## SECTION S1

### Pictorial details of the heat exchange system

The counter-current heat exchanger was designed to ensure that the temperature of the solution of hyperpolarized solute(s) ( $^{13}\text{C}$ -urea in the present case) would be the same as that of the cell suspension into which it is injected.

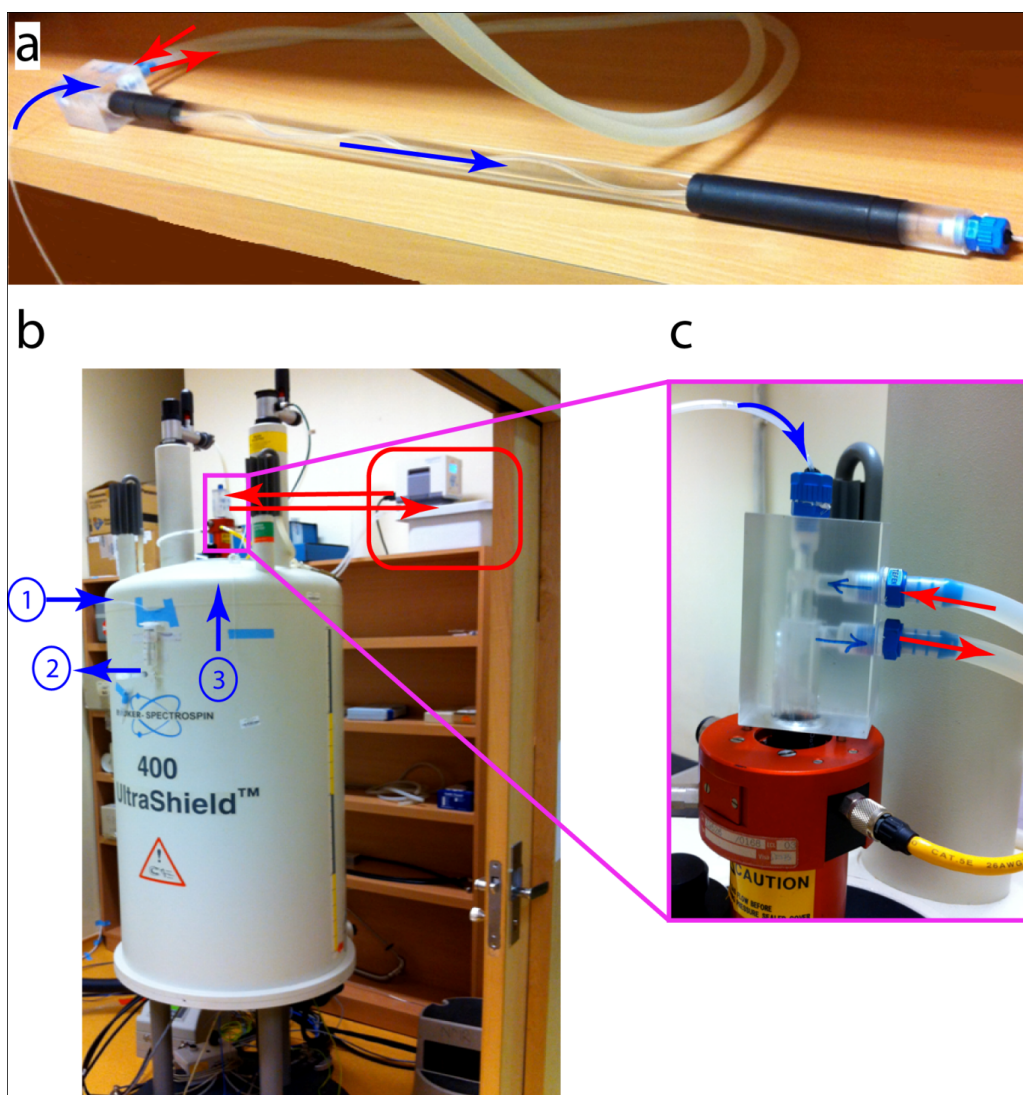

**Figure S1:** A double-envelope Perspex tube assembly was used to thermostat the solution containing hyperpolarized  $^{13}\text{C}$ -urea in the process of injection to the inside of the NMR tube containing a suspension of RBCs that was already thermally equilibrated. The flow directions of the injected solution, and of the water used to thermostat the system, are indicated in blue and red, respectively. (a) The double-envelope Perspex tube with a narrow-bore tube inside the inner envelope; and the tubing carrying the water from the thermostating bath. (b) The assembly was introduced inside the bore of the magnet, with the flow of hyperpolarized  $^{13}\text{C}$ -

urea solution following the sequential numbers: (1) reception of the hyperpolarized  $^{13}\text{C}$ -urea solution in the intermediate container after its rapid dissolution; (2) withdrawing the solution, retaining a predetermined amount (typically 2 mL) and then withdrawal the syringe plunger to take 5 mL of air into the barrel to serve as a chaser/mixer following injection of the solution; and (3) injection via the narrow-bore tube to the 10-mm glass sample tube containing the RBCs inside the NMR spectrometer. The water bath used to thermostat the system was located on a shelf next to the magnet. (c) A close-up image of the top of the magnet bore.

## SECTION S2

### 1D $^1\text{H}$ imaging and evidence of convection in the sample

To investigate if the 3<sup>rd</sup> peak found by deconvolution in the spectral time courses was due to inadequate mixing of the sample, we conducted imaging studies on the  $^1\text{H}_2\text{O}$  in various samples. The imaging pulse sequence entailed a spin echo with a read gradient applied along the  $z$ -direction ( $\mathbf{B}_0$  direction). Note that the coil gradient profile was parabolic and not rectangular.

A problem with mixing a hyperpolarized solution with a dense (high  $Ht$ ) RBC suspension should become evident from variations and irregularities of the  $^1\text{H}$  imaging profile, compared to an image of a static reference sample. The evolution of the imaging profile after injecting a ‘hyperpolarized-like’ solution into packed RBCs is shown on Fig. S2. The  $^1\text{H}$ -image profile changed over the first 60 to 90 s and then settled into a relatively stable parabolic shape. Convection alone will diminish the spin-echo signal intensity as the mixing causes a loss of magnetization-phase coherence in a spin-echo experiment. This phenomenon is independent of whether the solution or suspension of RBCs is chemically mixed or not. In other words, the fact that the integral of the  $^{13}\text{C}$  NMR spectrum of  $^{13}\text{C}$ -urea in this circumstance remained constant, implied that the amount of the labelled urea in the sensitive volume of the NMR probe was constant, even from the earliest of the recorded spectra.

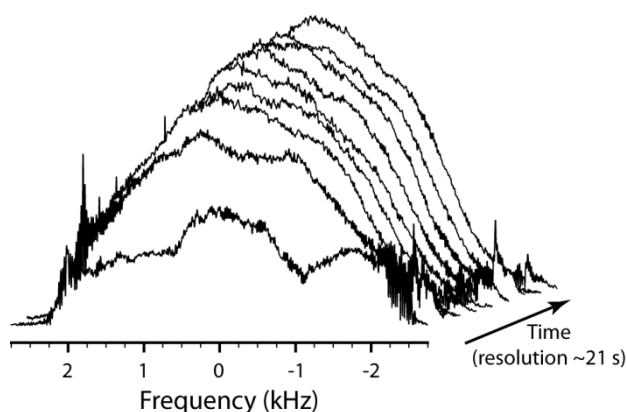

**Figure S2:**  $^1\text{H}$  spin-echo based 1D-image time course of  $^1\text{H}_2\text{O}$ , performed at  $37^\circ\text{C}$  on a suspension of 2 mL of RBCs ( $Ht \sim 0.80$ ) to which 2 mL of ‘hyperpolarized-like’ solution, heated to  $37^\circ\text{C}$ , was injected. This mimicked the DNP experimental conditions.

To evaluate further whether incomplete sample mixing or simple convection was at play in the early stages of the DNP experiments, we injected isotonic saline containing 0.5% BSA into the same solution. The results are shown in Figs. S3a and b for  $25^\circ\text{C}$  and  $37^\circ\text{C}$ , respectively. Clearly, at  $25^\circ\text{C}$  that the sample reached flow equilibrium (no convection) in less than 10 s, but a significant amount of convection was evident at the physiological temperature ( $37^\circ\text{C}$ ). At long times after the injection at  $37^\circ\text{C}$  (not shown; and not at  $25^\circ\text{C}$ ), the  $^1\text{H}$  imaging profile was still distorted implying that there were persistent thermal gradients that arose independently of the sample-injection process, leading to convection along the NMR tube.

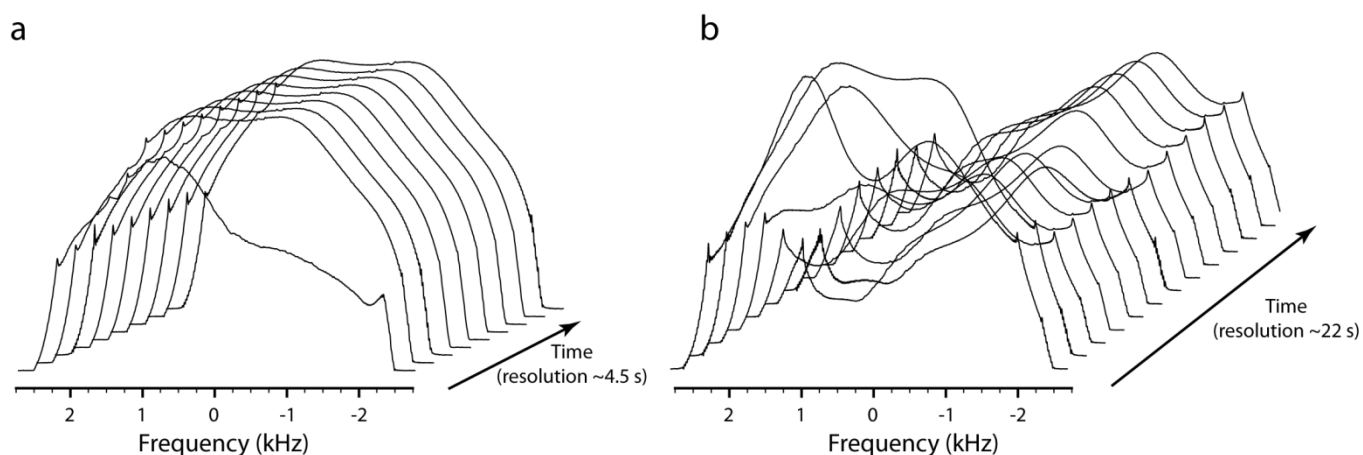

**Figure S3:**  $^1\text{H}$  spin-echo based 1D-imaging time course after addition of 2 mL of isotonic saline containing 0.5% BSA into 2 mL of the same solution present inside the NMR magnet at: (a)  $25^\circ\text{C}$ ; and (b)  $37^\circ\text{C}$ . The variations in the 1D profiles at  $37^\circ\text{C}$  were concluded to be due

to thermally-driven convection in addition to that caused by the momentum of the injected solution (that produced streaming) in the process of mixing.

In summary, the  $^1\text{H}$  imaging profile of solutions free of RBCs evolved over  $\sim 60$  s after addition of the ‘hyperpolarized-like’  $^{13}\text{C}$  urea solution. This could have come about from both: (i) heterogeneity in the sample (incomplete mixing); and (ii) macroscopic flow (convection). The latter could arise from streaming (turbulence) due to the momentum of the inflowing liquid, and flow brought about by thermal gradients. This flow, no matter what its origin causes dephasing of magnetization and hence attenuation of the spin-echo signal. We observed a longer time course of evolution at  $37^\circ\text{C}$  in the presence of RBCs, which have a greater tendency for coherent streaming (because of the larger ‘packet size’ of the suspension) than for free solution. Thus we concluded that sample heterogeneity (incomplete mixing of the solvent and solute) had a negligible effect on the  $^1\text{H}$  imaging profile and that it was due to turbulence brought about by the injection process.

### **Experimental details**

The experimental setup was similar to the one described in the main text. A block-heater was used to pre-warm the added solutions. The pulse sequence was a spin-echo with a  $z$ -direction magnetic field gradient switched on during the first  $t$  period (between the  $90^\circ$  and  $180^\circ$  pulse, of duration 46 ms) corresponding to half of the acquisition time, followed by a recovery period of 200 ms. After the  $180^\circ$  RF pulse, the magnetic field gradient was turned on again and the signal acquisition started (acquisition time 92 ms). The gradient intensity was 2% of its maximum available value ( $\sim 55 \text{ G cm}^{-1}$ ) leading to an image width of  $\sim 5$  kHz.



## SECTION S3

Hyperpolarized  $^{13}\text{C}$ -urea time course after injection into suspensions of RBCs and fittings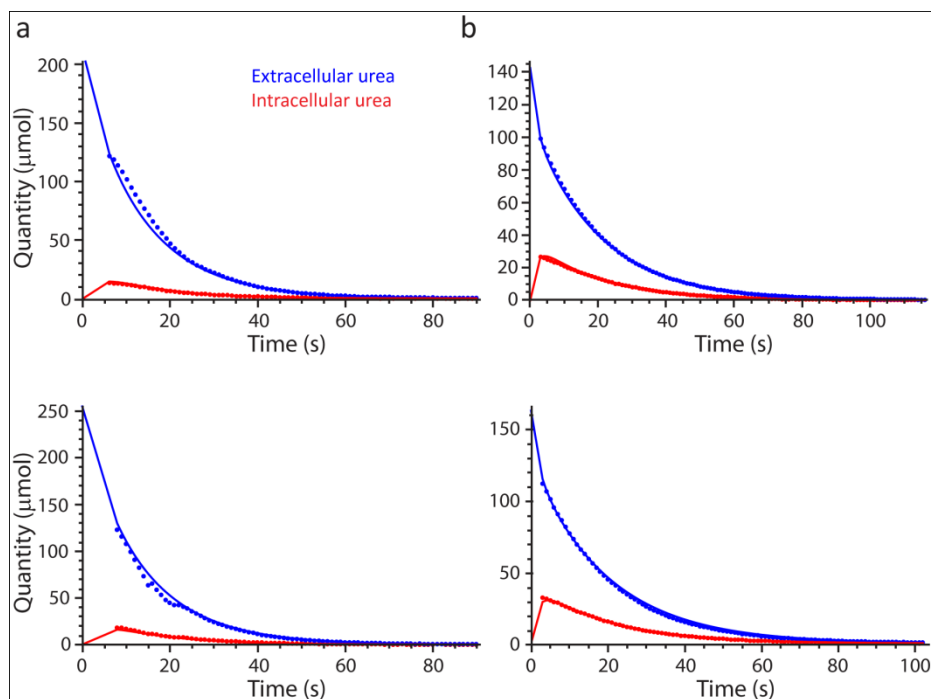

**Figure S4:** Extra- and intracellular hyperpolarized  $^{13}\text{C}$ -urea quantity as a function of time after addition of 2 mL of hyperpolarized  $^{13}\text{C}$ -urea to 2 mL of RBCs (data points). The solid lines denote the fit obtained from the averaged values returned by the MCMC data-analysis. Duplicate experiments (top and bottom) were fitted simultaneously. (a) 20°C; and (b) 37°C.

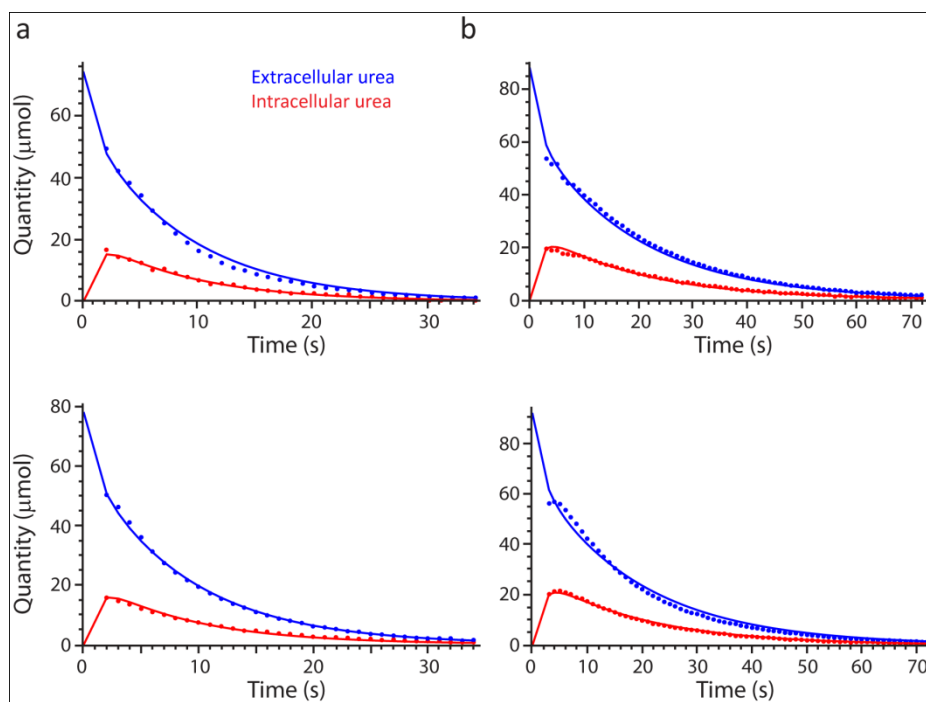

**Figure S5:** Extra- and intracellular hyperpolarized  $^{13}\text{C}$ -urea quantity as a function of time after addition of 1 mL of hyperpolarized  $^{13}\text{C}$ -urea to 2 mL of RBCs and 1 mL of buffer (data points). The solid lines denote the fit obtained from the averaged values returned by the MCMC data-analysis procedure. Duplicate experiments (top and bottom) were fitted simultaneously. (a) 20°C; and (b) 37°C.

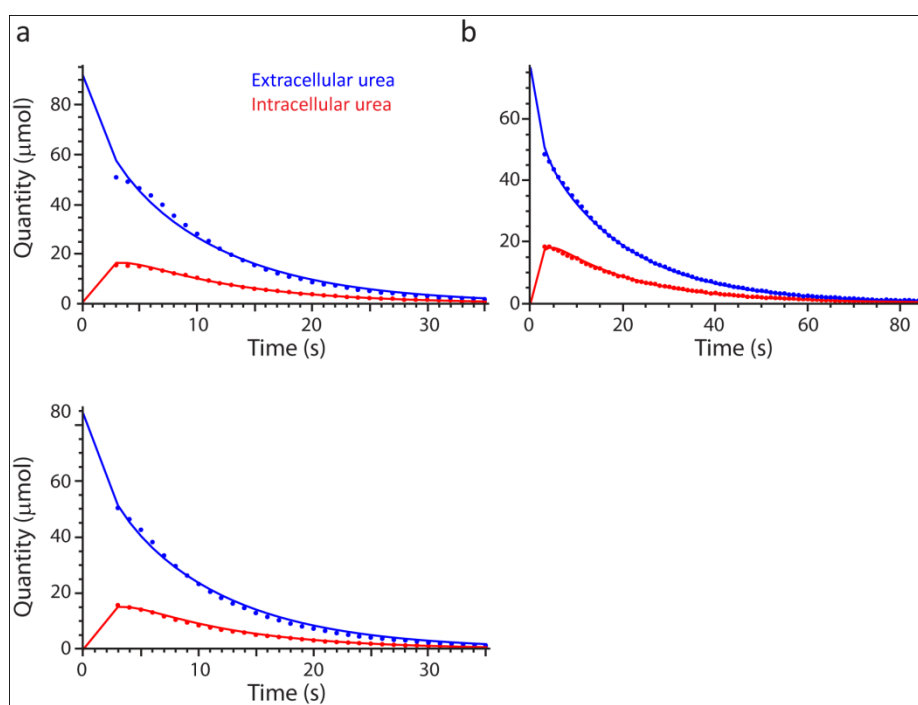

**Figure S6:** Extra- and intracellular hyperpolarized  $^{13}\text{C}$ -urea quantity as a function of time after addition of 1 mL of hyperpolarized  $^{13}\text{C}$ -urea to 2 mL of RBCs and 1 mL of buffer containing 40 mM of unlabelled urea (data points). The solid lines denote the fits obtained from the averaged values returned by the MCMC data-analysis procedure. Duplicate experiments (top and bottom) were fitted simultaneously. **(a)** 20°C; and **(b)** 37°C.

## SECTION S4

## Kinetic parameter simulation

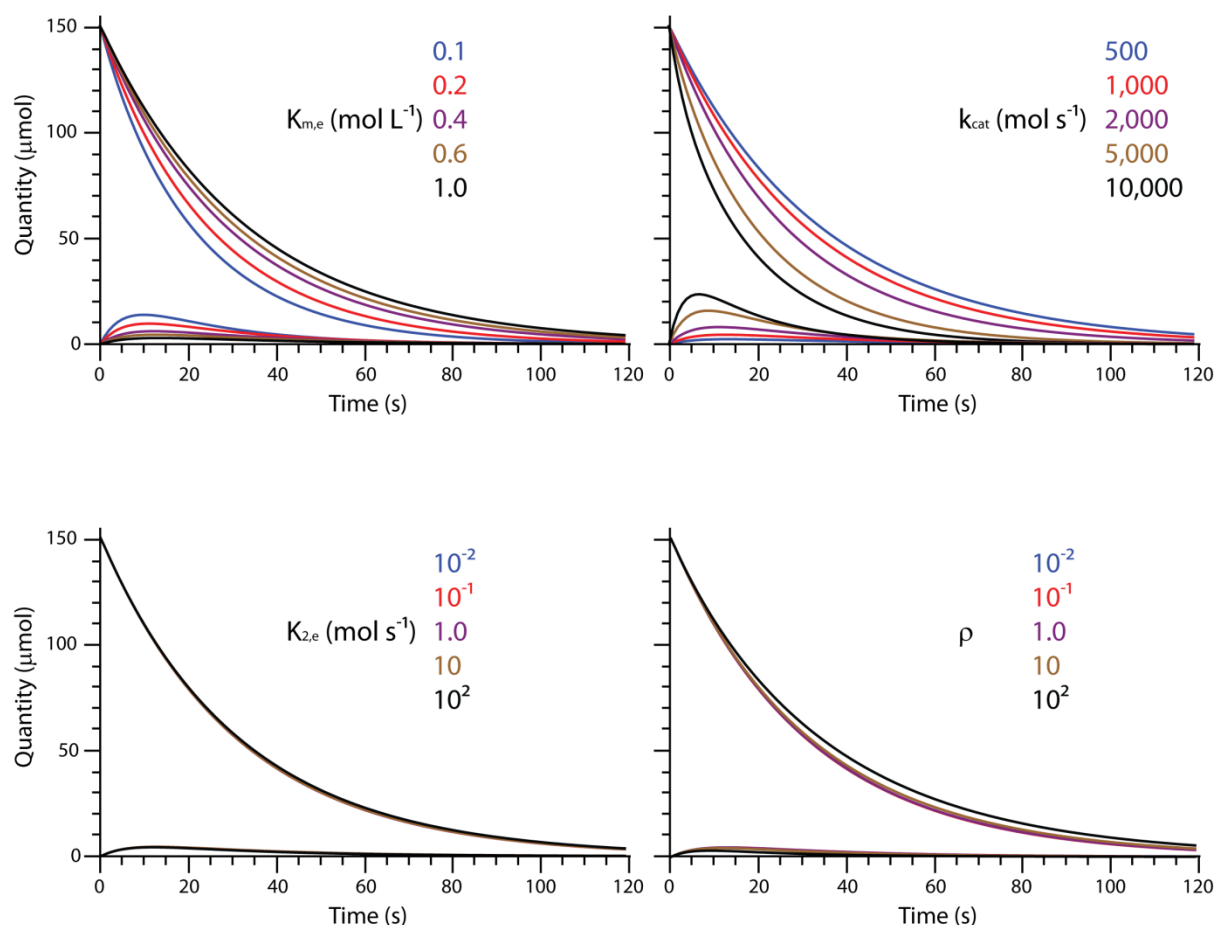

**Figure S7:** Sensitivities of the responses of a mathematical model of the transport system to changes in each parameter value. The sensitivities were evaluated by simulating signal time courses as the values of individual parameters were varied; one parameter was varied for each graph as indicated in the key in each sub-figure. All other parameters were held constant at the values indicated in Table S1. Changes in the transmembrane enzyme-kinetic parameters,  $K_{2e}$  and  $r$  had minimal effect on the simulated time courses; and importantly, this was the basis of the decision to reduce the kinetic model to that of a simple product-inhibited Michaelis-Menten system.

**Table S1:** Parameters and their values used to generate the simulated signal evolution shown in Fig. S5.

| $T_{1,e}$<br>(s) | $T_{1,i}$<br>(s) | $K_{m,e}$<br>(mol L <sup>-1</sup> ) | $K_{2,e}$<br>(mol s <sup>-1</sup> ) | $r$ | $k_{cat}$<br>(mol s <sup>-1</sup> ) | Urea <sub>t=0</sub><br>(mmol) | RF pulse<br>(deg) |
|------------------|------------------|-------------------------------------|-------------------------------------|-----|-------------------------------------|-------------------------------|-------------------|
| 43               | 7                | 0.6                                 | 0.5                                 | 0.2 | 1000                                | 150                           | 4                 |
